# Supplementary material for: Substrate Stiffness Modulates TGF-β Activation and ECM-Associated Gene Expression in Fibroblasts
Source: MDPI journal article supplement (doi:10.3390/bioengineering10090998), 2023-08-23
Supplement: s1 [file s1]

## Supplementary Figures

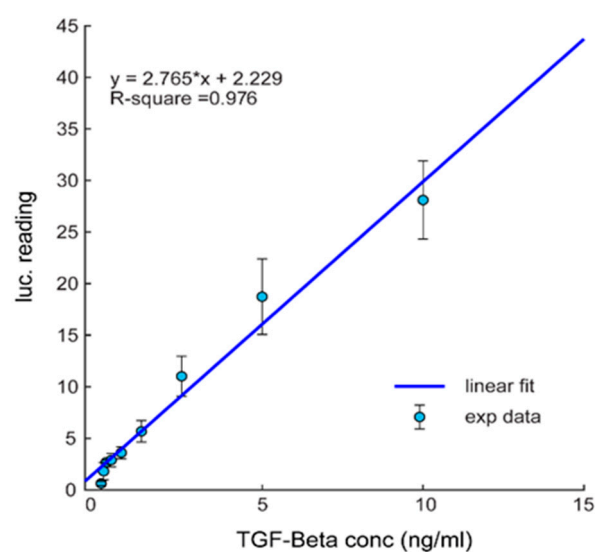

**Figure S1:** Standard curve for recombinant TGF- $\beta$  protein response using CCL64 PAI assay is shown.

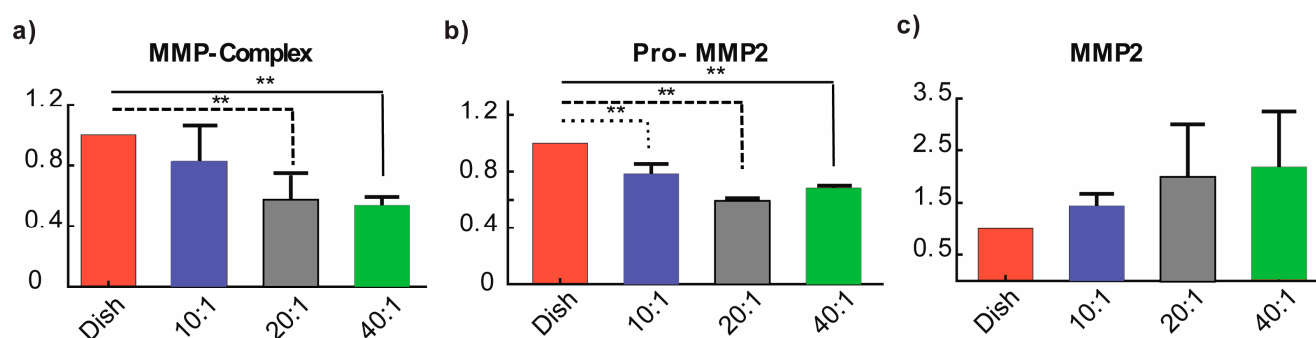

**Figure S2:** Quantification of Gelatin zymography images (Fig. 2d) with condition media collected from cells cultured on dish, 10:1 (1.58 MPa), 20:1 (351 kPa) and 40:1 (41.89 kPa) PDMS substrates were assayed for MMP-Complex, Pro-MMP-2 and MMP-2. Data are represented as mean  $\pm$  SEM; \* p<0.05; \*\* p<0.01.

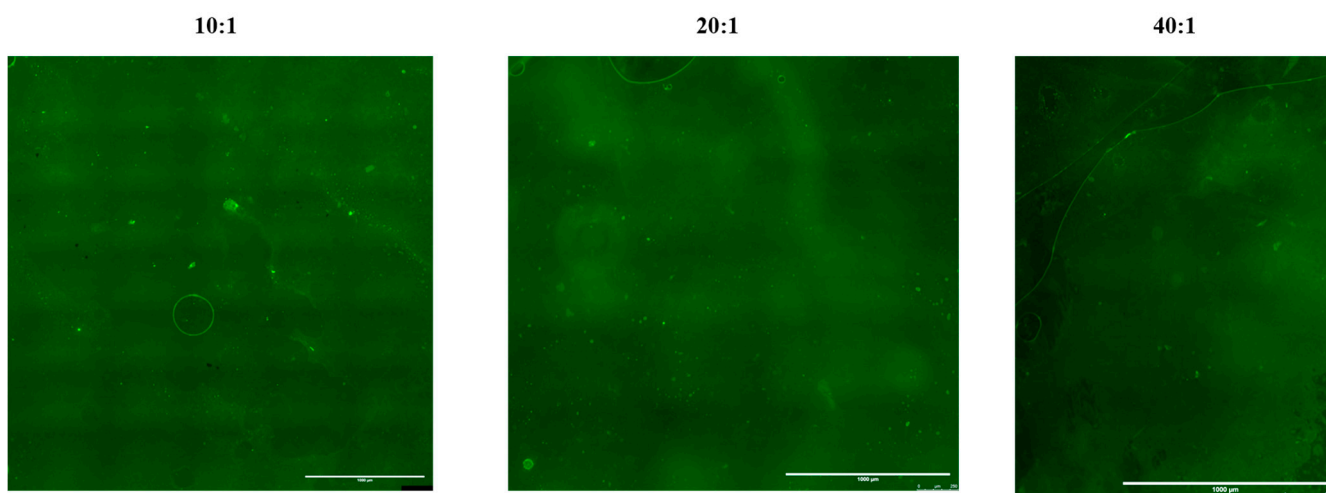

**Figure S3.** Tile scan images taken in a live cell fluorescent microscope showing uniform coating of fluorescently tagged fibronectin on PDMS substrates with different stiffness (10:1, 20:1, 40:1).

### Supplementary Table

**Table S1:** Primers used in the study are indicated.

| Gene                              | Sequence                       |
|-----------------------------------|--------------------------------|
| <b>MMP2_FP</b>                    | 5' GCGGCGGTCACAGCTACTT 3'      |
| <b>MMP2_RP</b>                    | 5' CACGCTCTTCAGACTTTGGT 3'     |
| <b>Col I_FP</b>                   | 5' GTGATTGGGCGGGATGTCTTCGTC 3' |
| <b>Col I_RP</b>                   | 5' CCCCAGCCACAAAGAGTCTACA 3'   |
| <b>Col III_FP</b>                 | 5' TCCTGAGGACCAGTAGGCA 3'      |
| <b>Col III_RP</b>                 | 5' CGCCCTCCTAATGGTCAAGG 3'     |
| <b>TGF-<math>\beta</math>1_FP</b> | 5' TACCTGAACCCGTGTTGCTCTC 3'   |
| <b>TGF-<math>\beta</math>1_RP</b> | 5' GTTGCTGAGGTATCGCCAGGAA 3'   |
| <b>GAPDH_FP</b>                   | 5' GTCTCCTCTGACTTCAACAGCG 3'   |
| <b>GAPDH_RP</b>                   | 5' ACCACCCTGTTGCTGTAGCCAA 3'   |
